# Supplementary material for: Brain-Mimetic 3D Culture Platforms Allow Investigation of Cooperative Effects of Extracellular Matrix Features on Therapeutic Resistance in Glioblastoma
Source: Oxford University Press journal article supplement (doi:10.1158/0008-5472.can-17-2429), 2017-12-27
Supplement: 00085472can172429-sup-187723_2_supp_4459057_p290v1.docx [file 00085472can172429-sup-187723_2_supp_4459057_p290v1.docx]

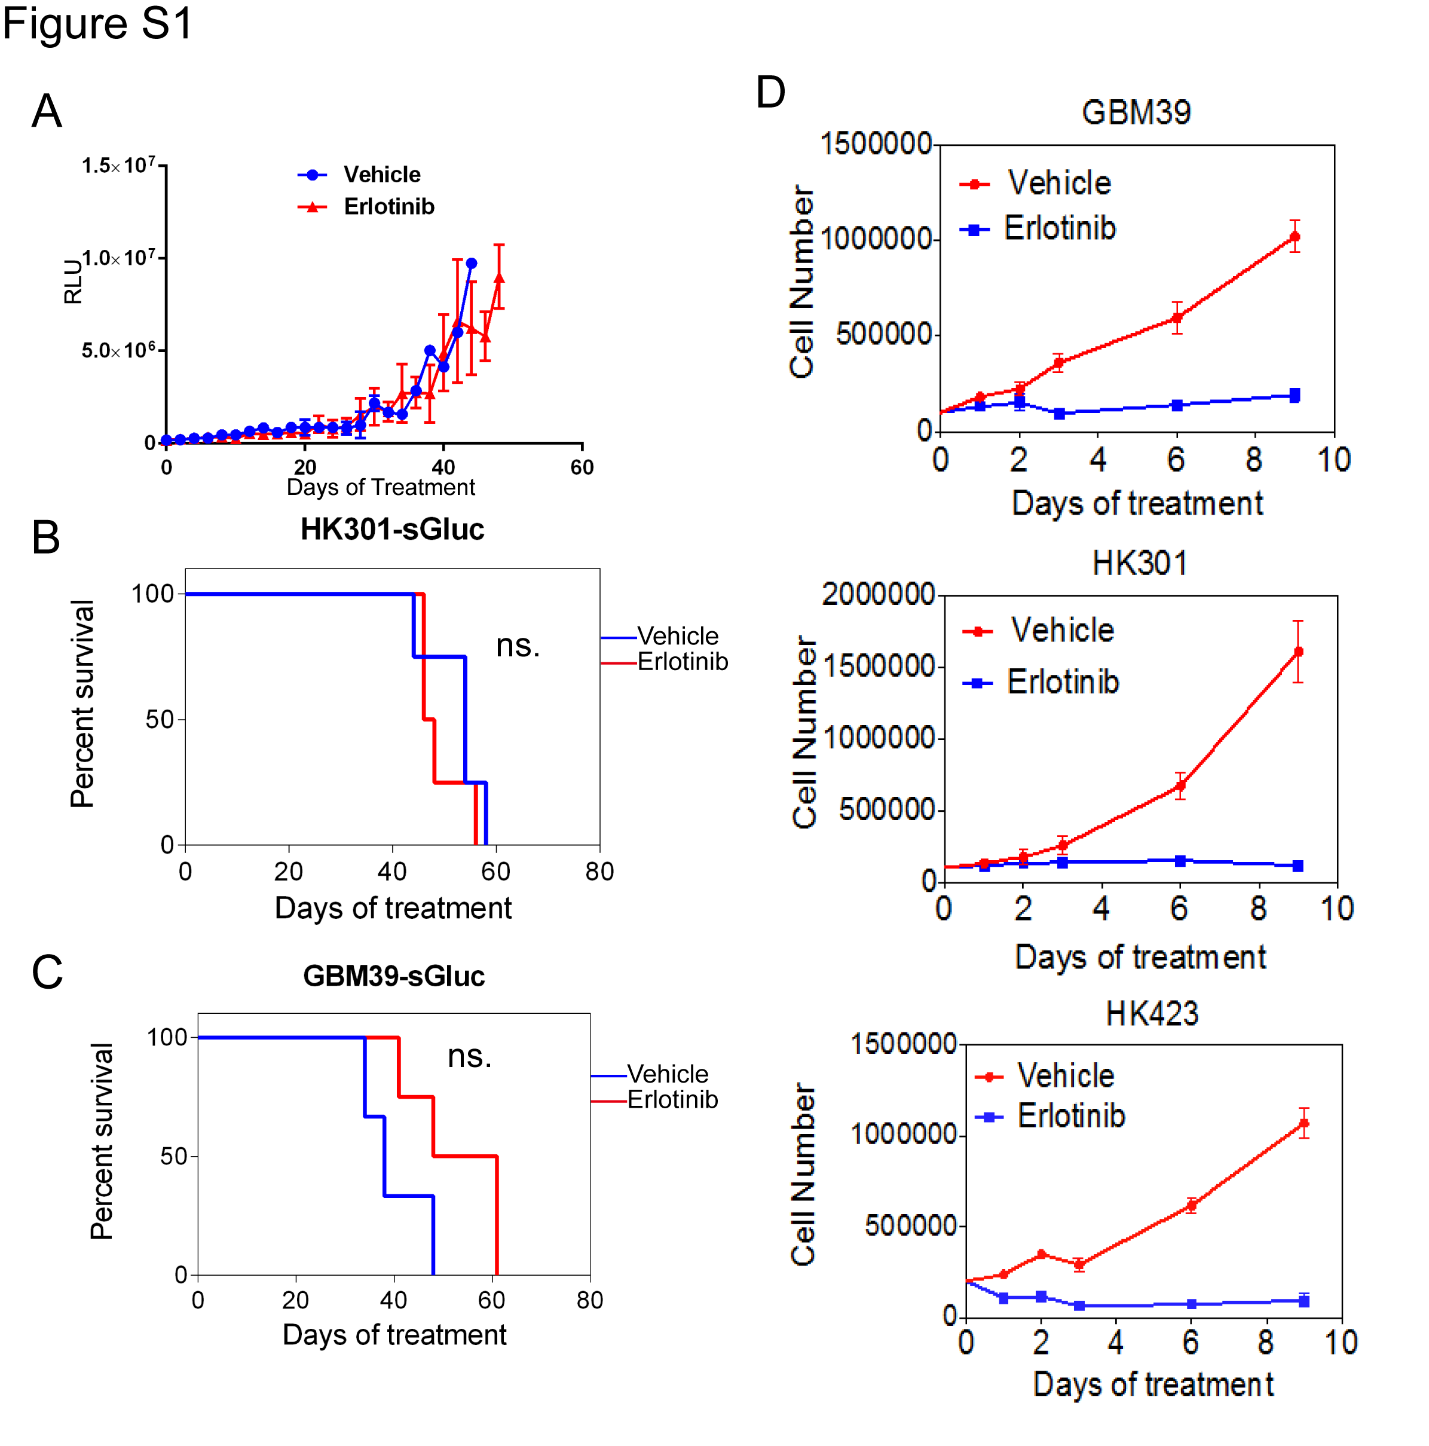


Figure. S1. A) Bioluminescence imaging of orthotopic xenografts of HK301 cells (normalized to day 0 before treatment with 75mg/kg erlotinib). Error bars represent standard deviation (n=4). B,C) Kaplan-Meier survival plots of mice with patient-derived xenografts. B) HK301 xenografts treated with 75mg/kg erlotinib (n=8) C) GBM39 xenografts treated with 50mg/kg erlotinib (n=7). Log-Rank (Mantel-Cox) test was used to compare survival curves. “ns.” represents non-significance. D) Numbers of cells after treatment with erlotinib or vehicle (DMSO). Error bars represent standard deviation (n=3).


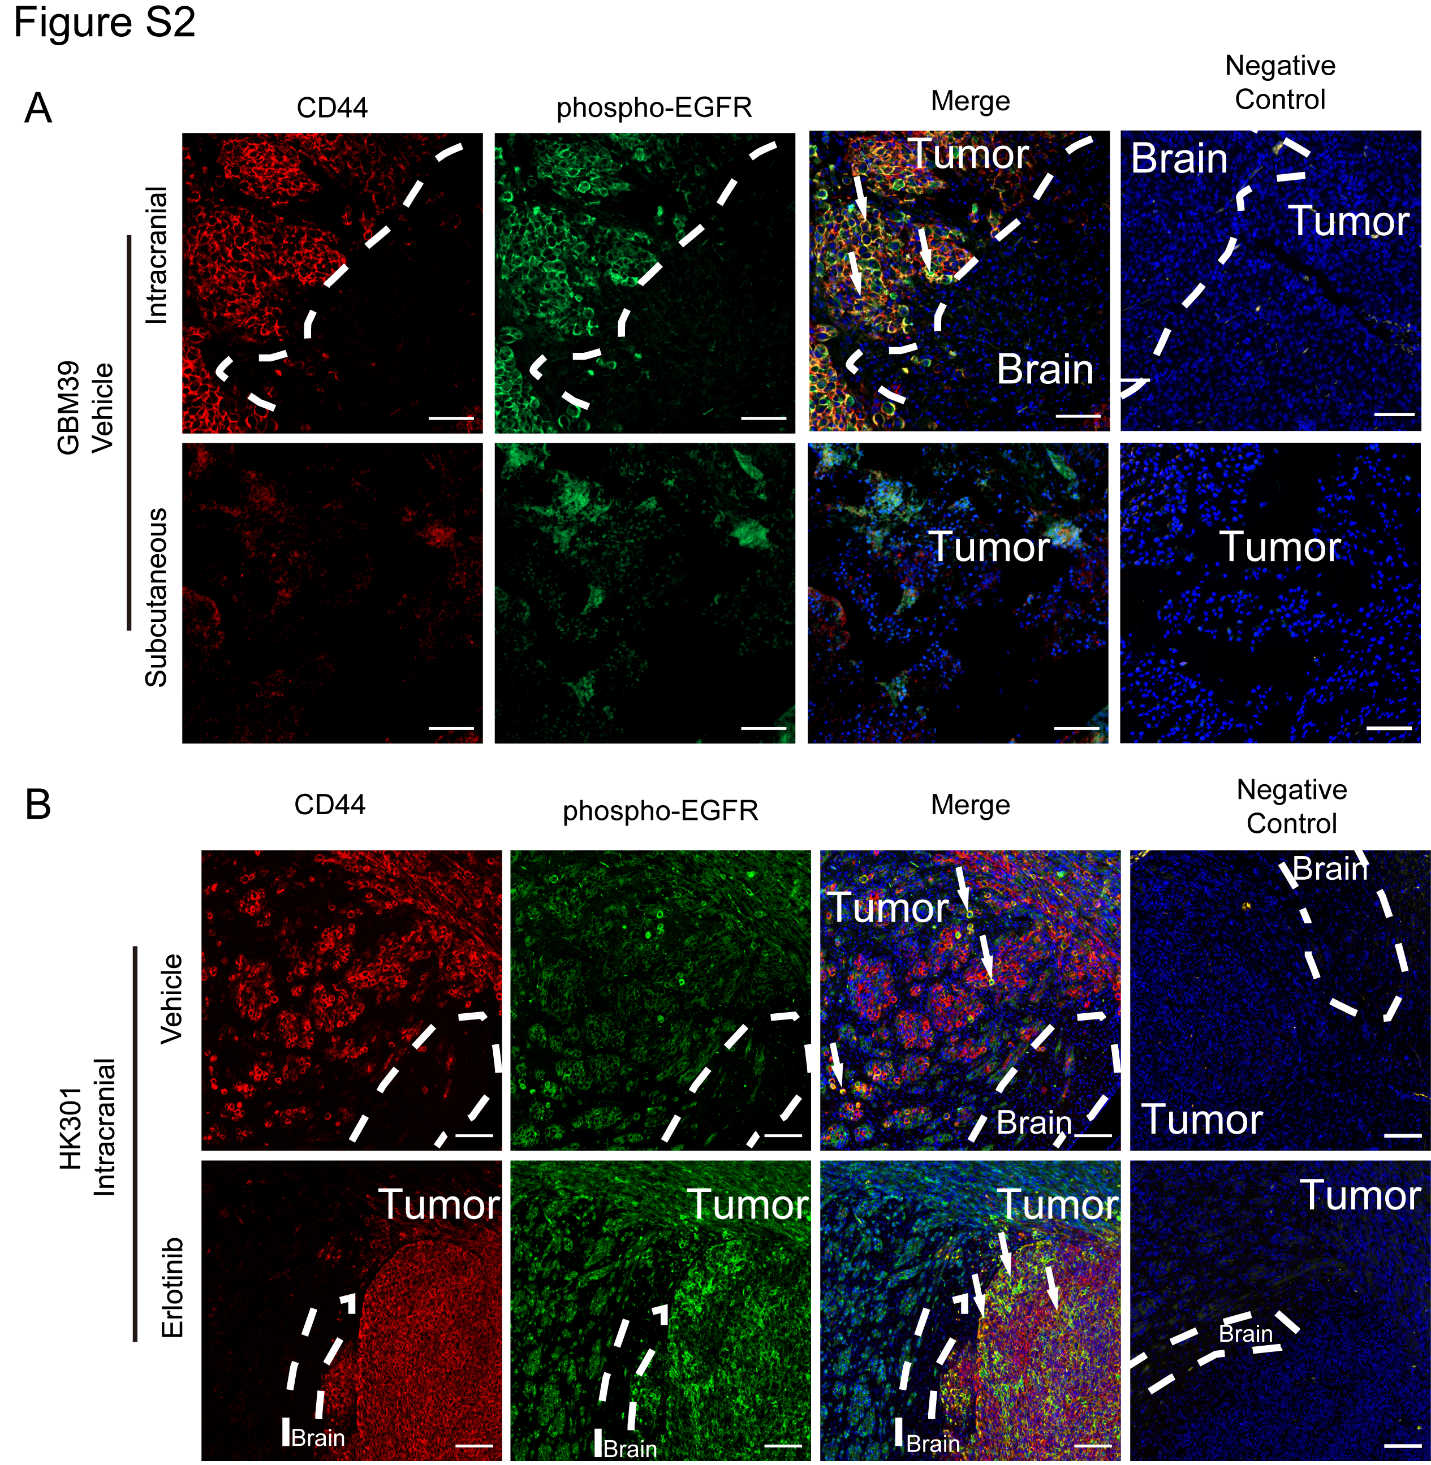


Figure. S2. Representative images of immunofluorescence staining for CD44 and p-EGFR in murine xenografts. A) Vehicle-treated xenografts of GBM39 cells. B) Intracranial xenografts of HK301 cells. CD44 (red), p-EGFR (green), and Hoechst 33342 (blue). Scale bars = 100 µm.


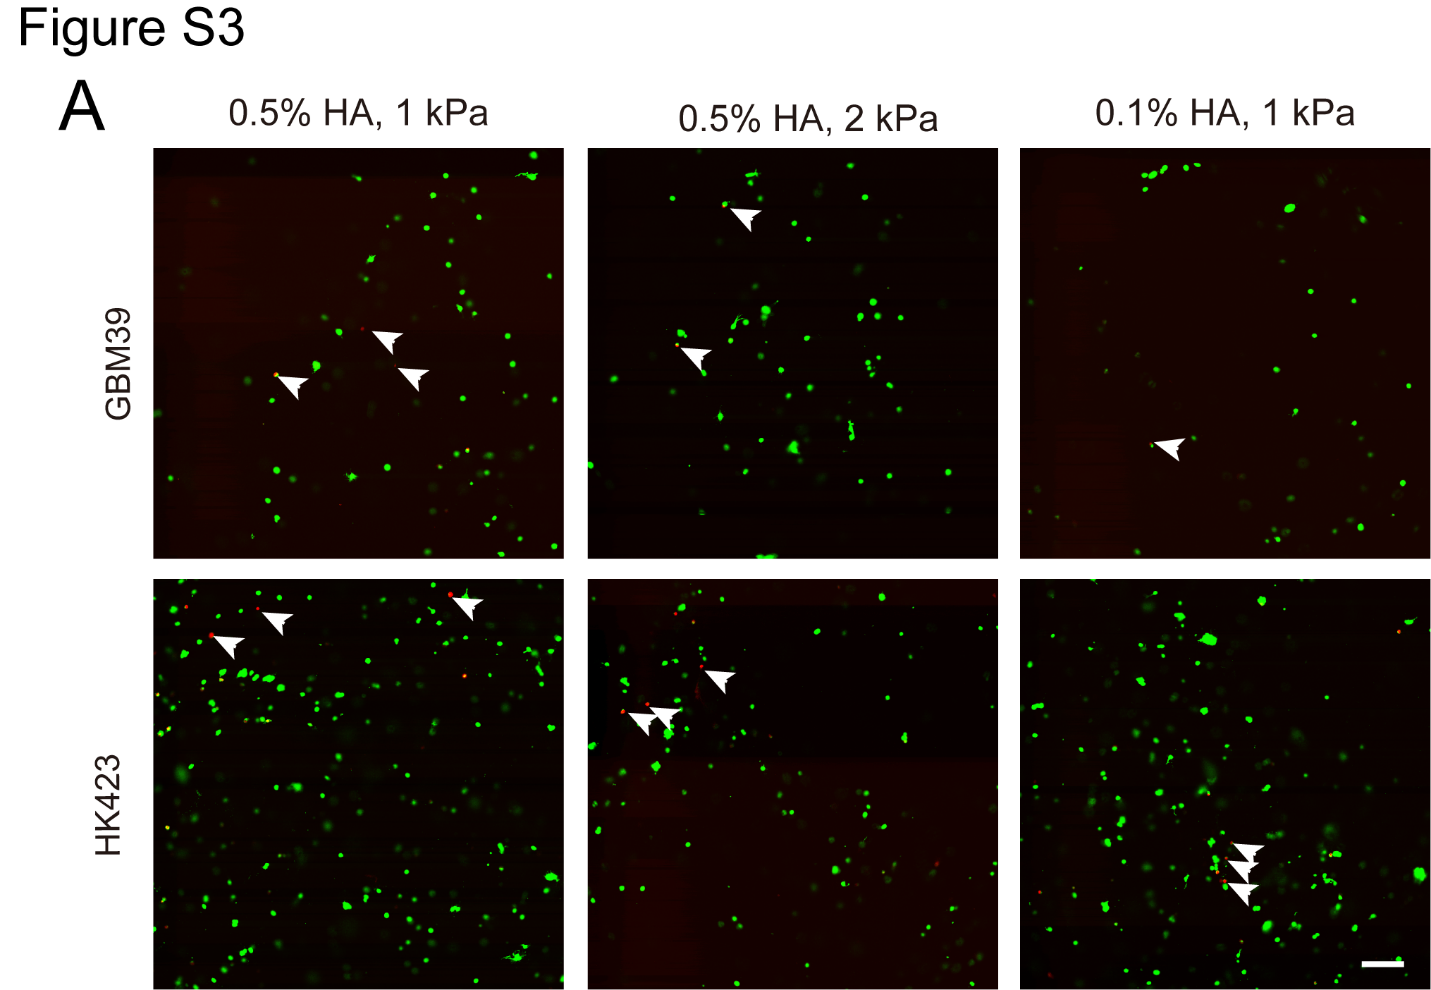


Figure. S3. A) Characterization of patient-derived GBM cells in 3D hydrogel culture. Representative confocal microscopy images showing live (green) and dead (red) cells 24 hours after hydrogel encapsulation. Percentage of HA indicates volume to weight ratio (% w/v). Arrows indicate dead cells. Linear compressive modulus is indicated in kPa. Scale bars = 100 μm.


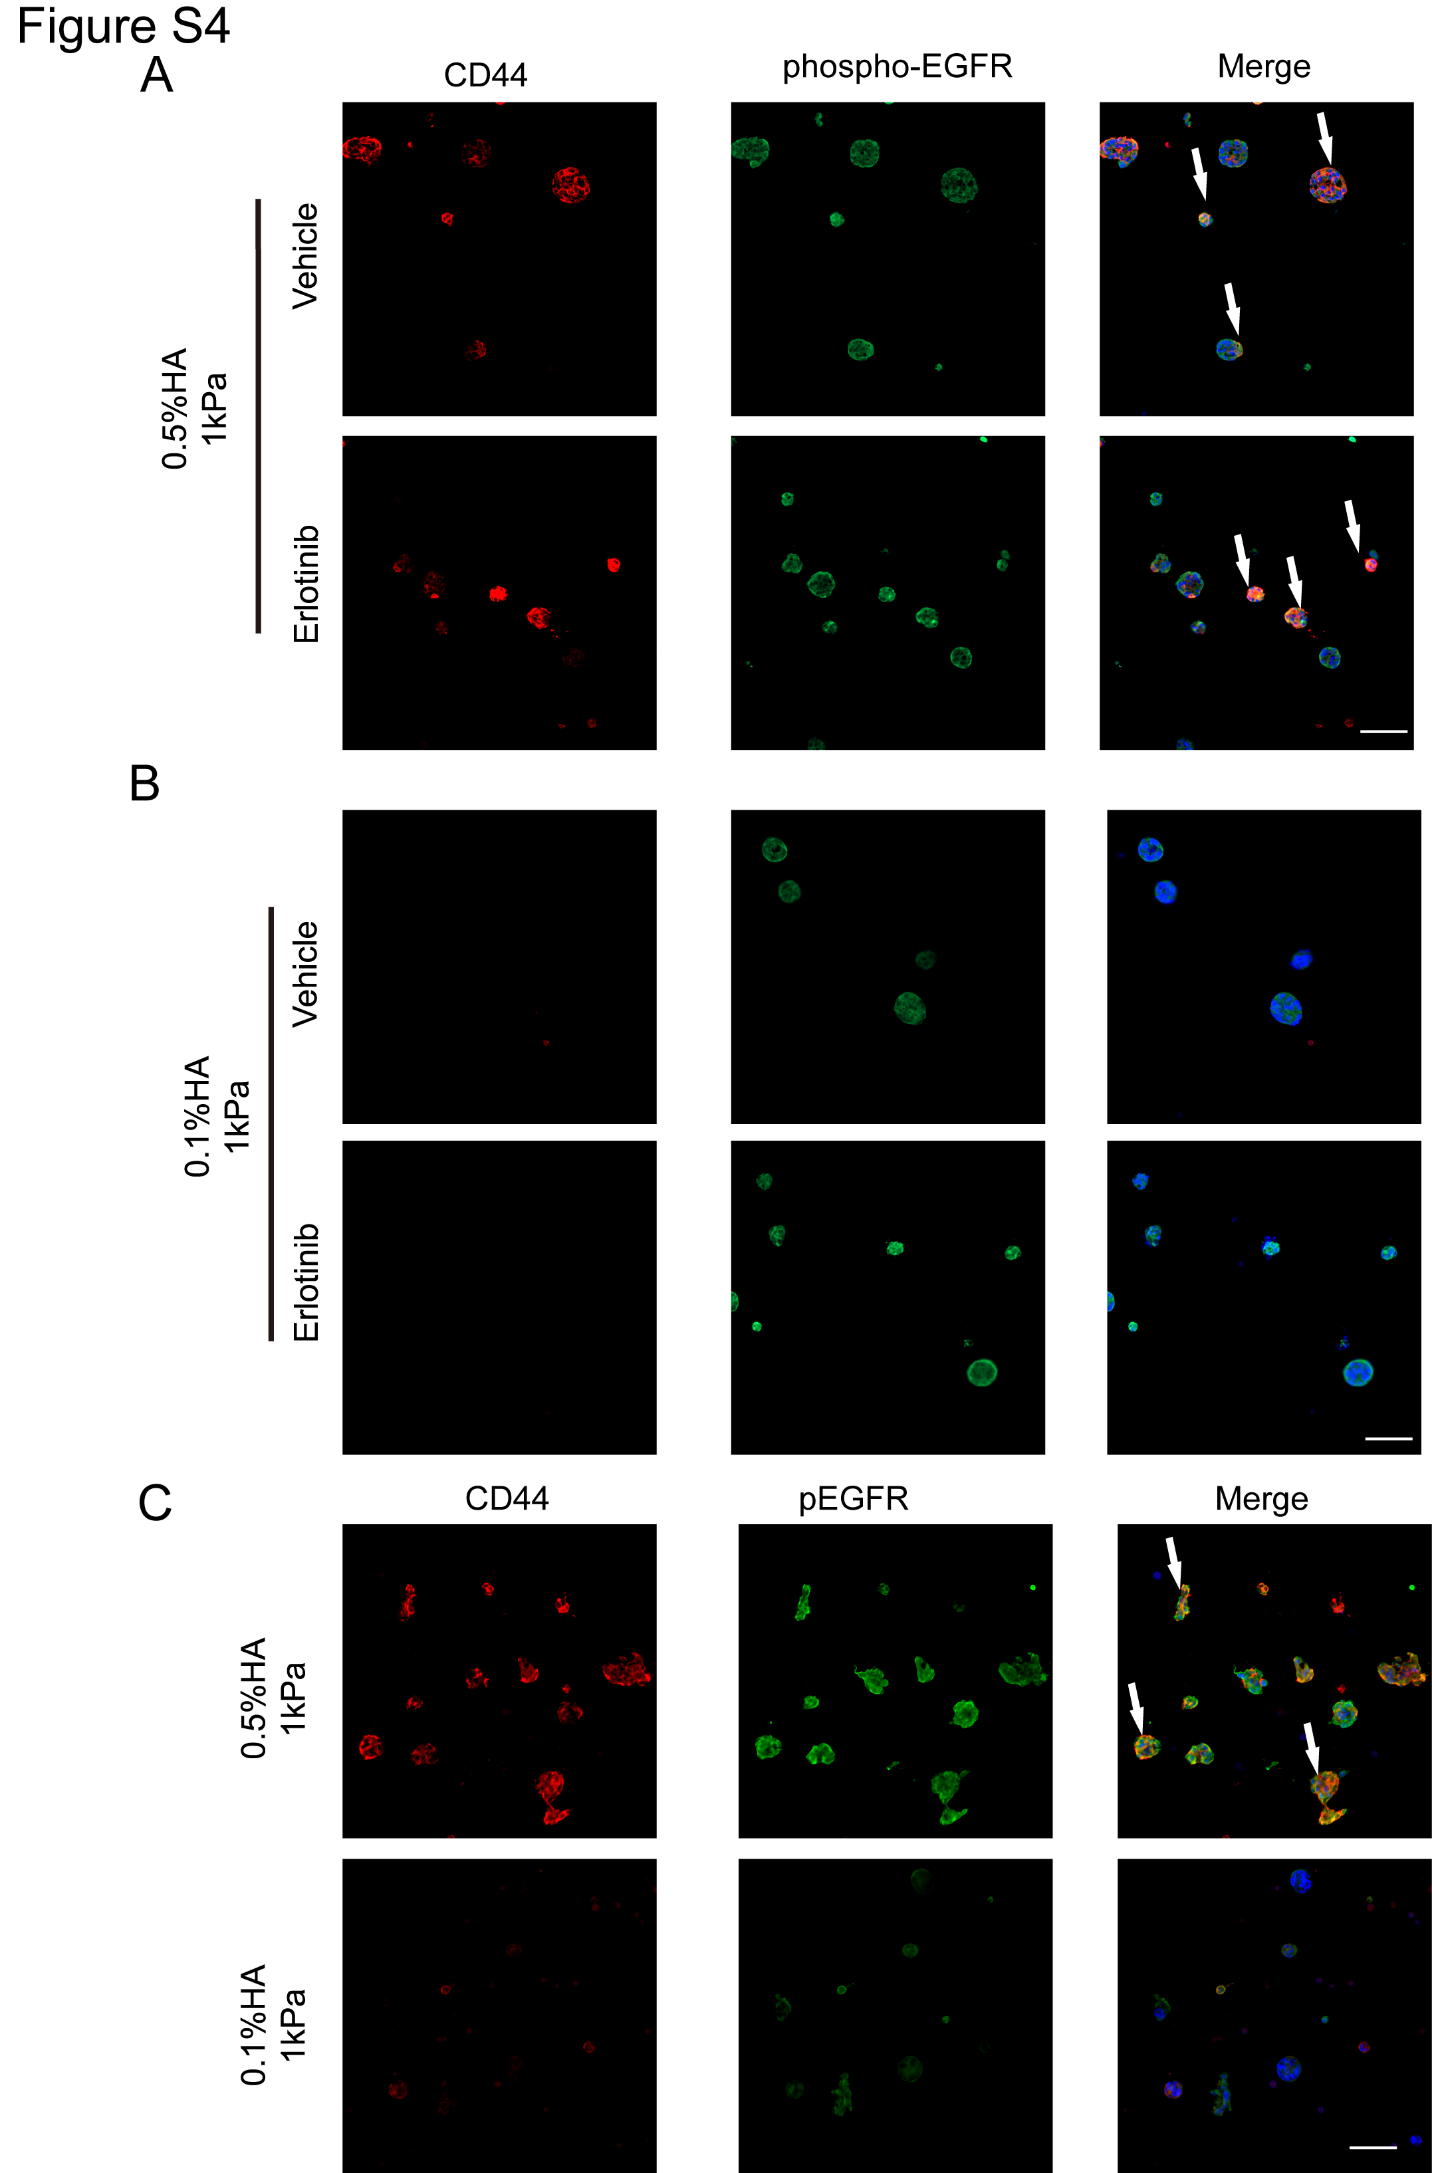


Figure. S4. A) Representative images of immunofluorescence staining for CD44 (red), p-EGFR (green), and Hoechst 33342 (blue) in hydrogel cultures. Arrows indicate overlapping staining for CD44 and p-EGFR. A) HK301 cells in 0.5% (w/v) HA, 1 kPa hydrogels 6 days after treatment. B) HK301 cells in 0.1% (w/v) HA, 1 kPa hydrogels 6 days after treatment. C) HK423 cells after 6 days of erlotinib treatment. Scale bars = 100 µm.


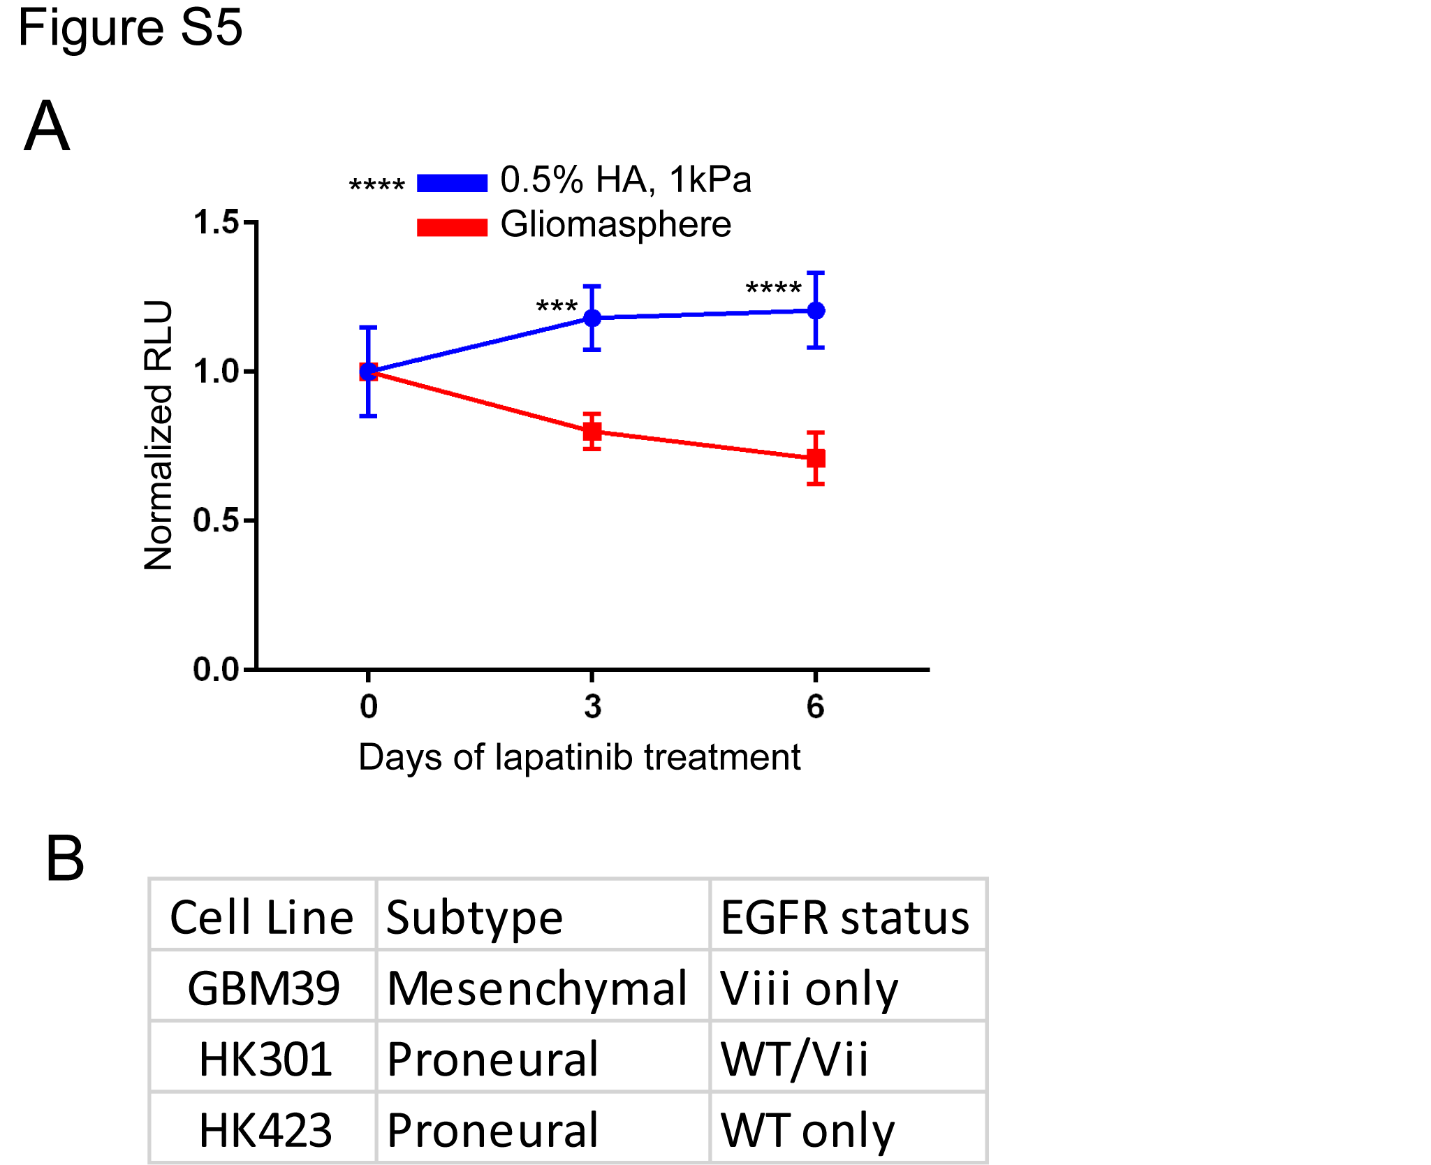


Figure. S5. A) Lapatinib resistance acquired in hydrogel cultures (0.5% w/v HA, 1 kPa). Bioluminescence signal measured 2 hrs after addition of D-luciferin (1 mM). Lapatinib-treated samples were normalized to non-treated samples and signal before treatment (day 0) for each condition. Two-way ANOVA (culture condition, time) with Šidák’s test for multiple comparisons of hydrogel condition against gliomasphere culture were performed. Error bars show standard deviation (n=3). ***p<0.001, *****p* < 0.0001. B) GBM subtype and EGFR status of cell lines (1,2).

1. Laks DR, Crisman TJ, Shih M, Mottahedeh J, Gao F, Sperry J, et al. Large-scale assessment of the gliomasphere model system. Neuro Oncol. 2016;**18**:1367–78.

2. Sarkaria JN, Carlson BL, Schroeder MA, Grogan P, Brown PD, Giannini C, et al. Use of an Orthotopic Xenograft Model for Assessing the Effect of Epidermal Growth Factor Receptor Amplification on Glioblastoma Radiation Response Cancer Therapy : Preclinical Epidermal Growth Factor Receptor Amplification on Glioblastoma Radiation Respon. Clin Cancer Res. 2006;**12**:2264–71.

**
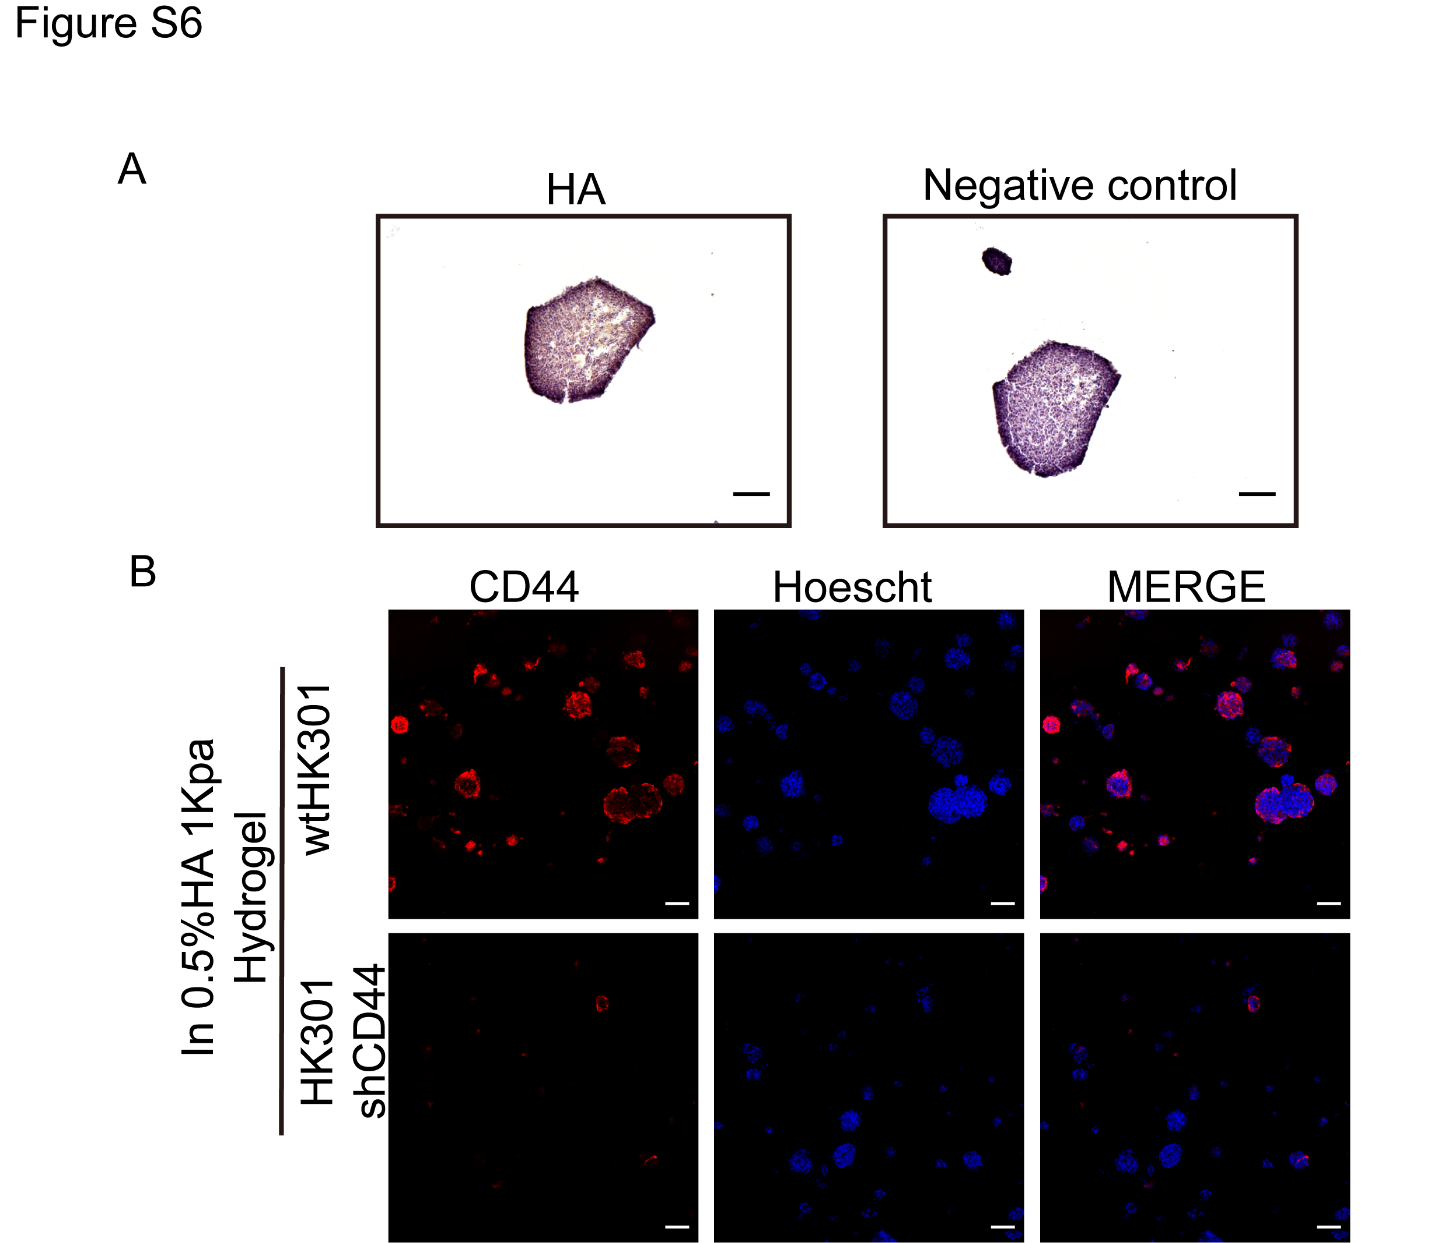
**

Figure. S6. A) Representative staining of HA (brown) and hematoxylin (purple) in HK301 gliomaspheres after 12 days of culture. Scale bars = 200 µm. B) Representative images of immunofluorescence staining for CD44 (red) and Hoechst 33342 (blue) in hydrogel cultures of wild-type HK301 and HK301 with shCD44 knockdown. Scale bars = 100 µm. B)

**
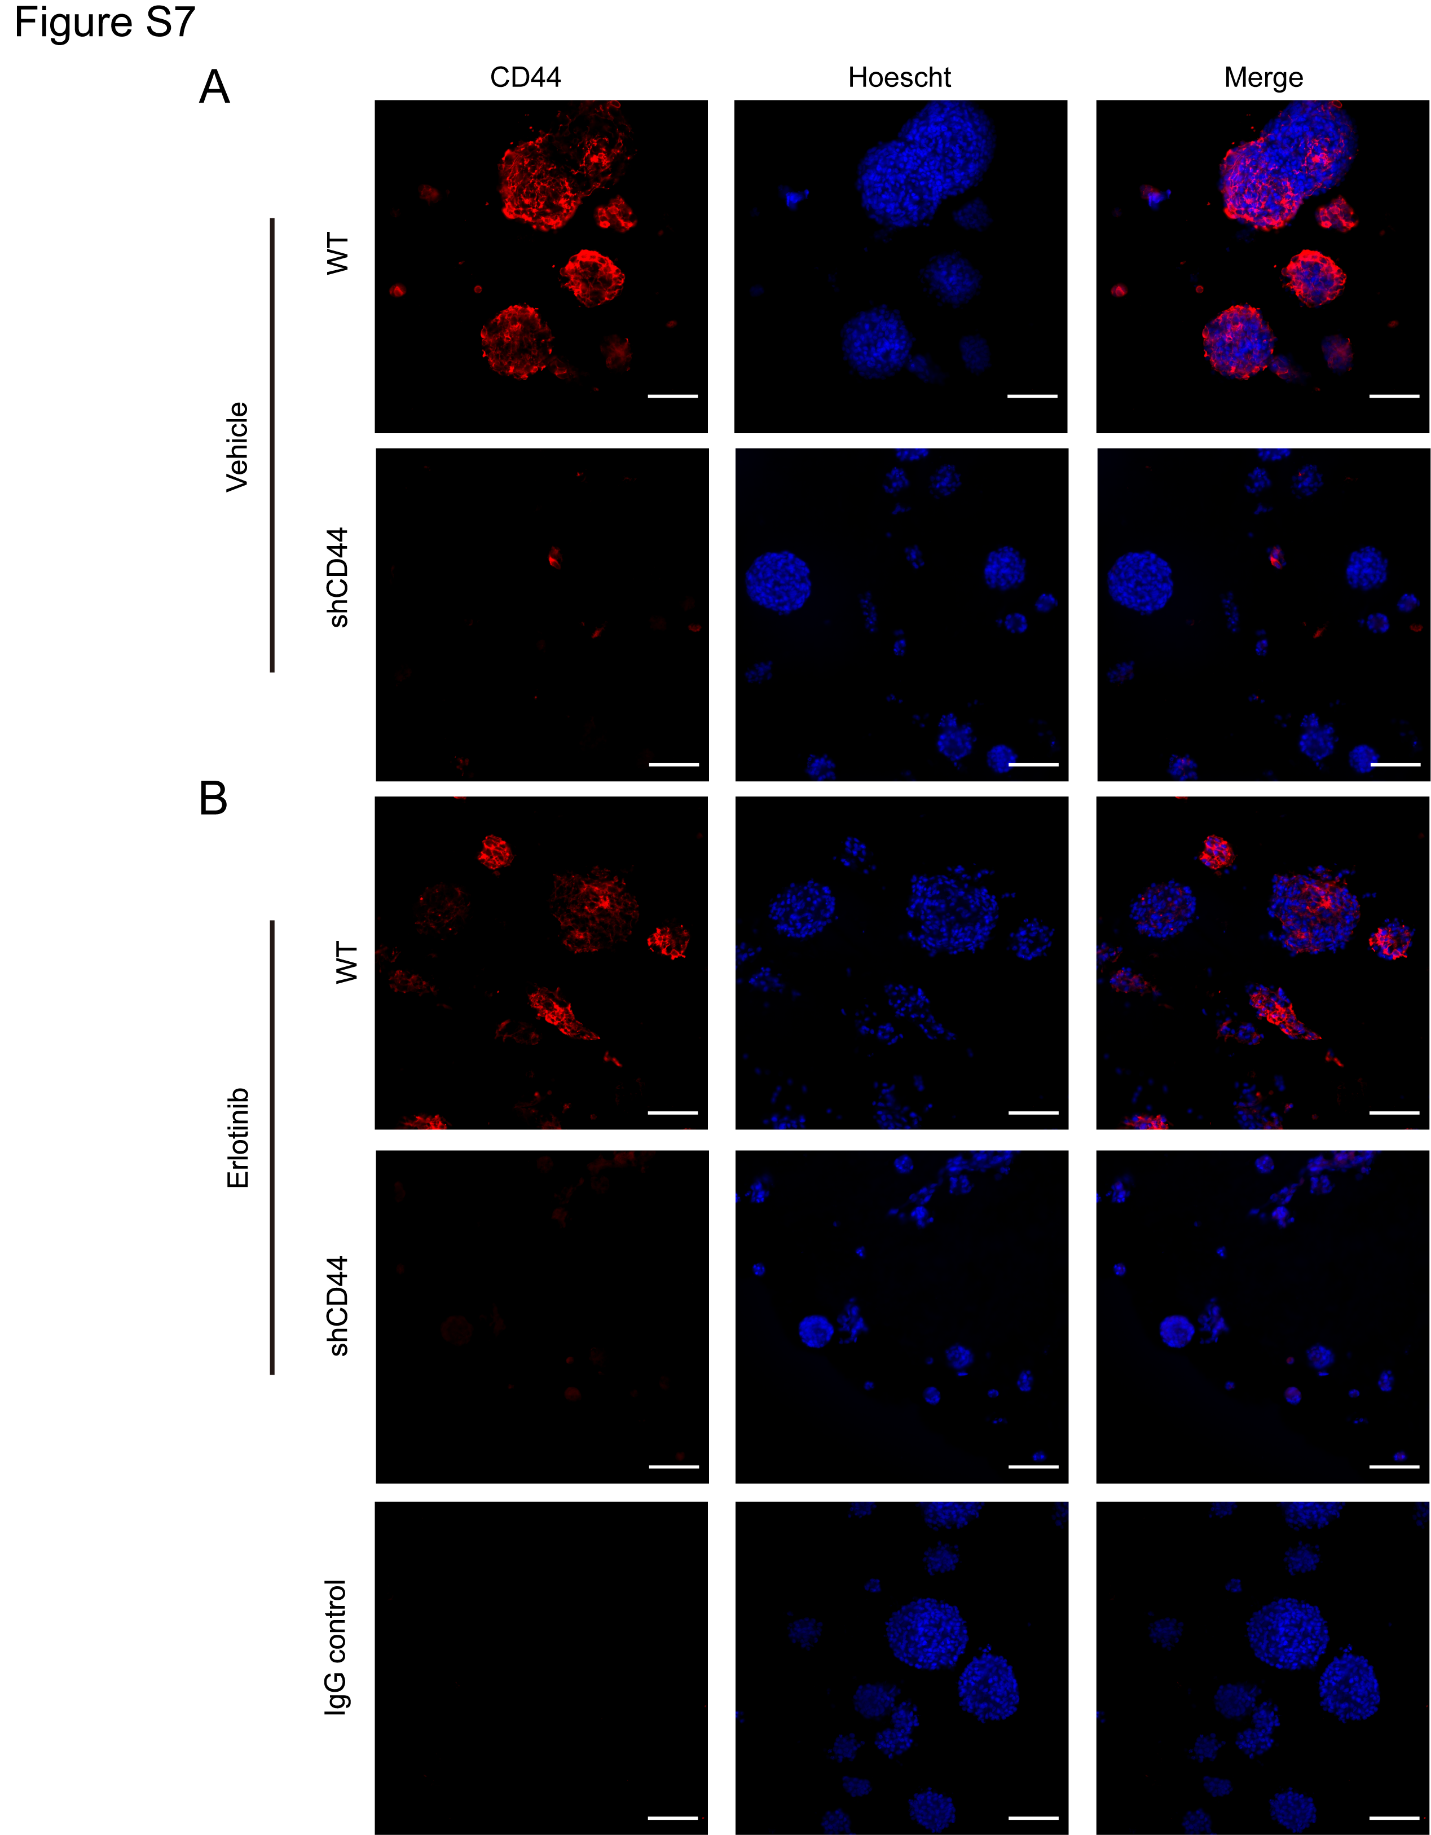
**

Figure. S7. Representative images of immunofluorescence staining for CD44 (red) and Hoechst 33342 (blue) after 12 days of erlotinib treatment of either wildtype (WT) or CD44 knockdown (shCD44) HK301 cultured in 0.5% (w/v), 1 kPa HA hydrogels. Scale bars = 100 µm.


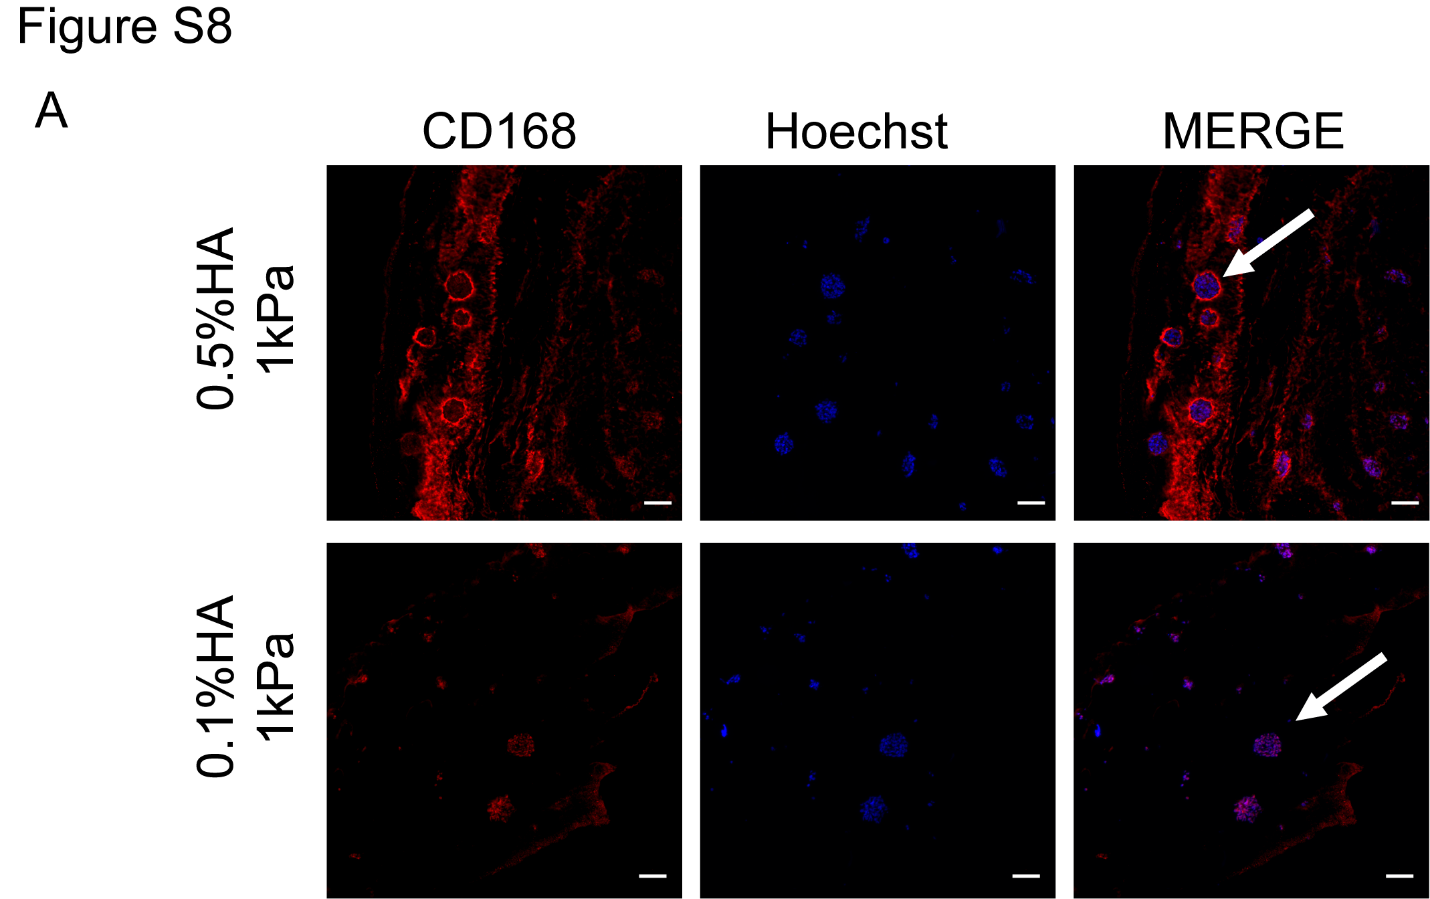


Figure. S8. A) Representative images of immunofluorescence staining for CD168 (red) on HK301 cells cultured in either 0.5% (w/v) or 0.1% (w/v) HA hydrogels. Samples were collected from vehicle group at day 6 after initiation of drug treatment. Scale bars = 100 µm. Arrows indicate localization of staining (surrounding the sphere or in nuclei).


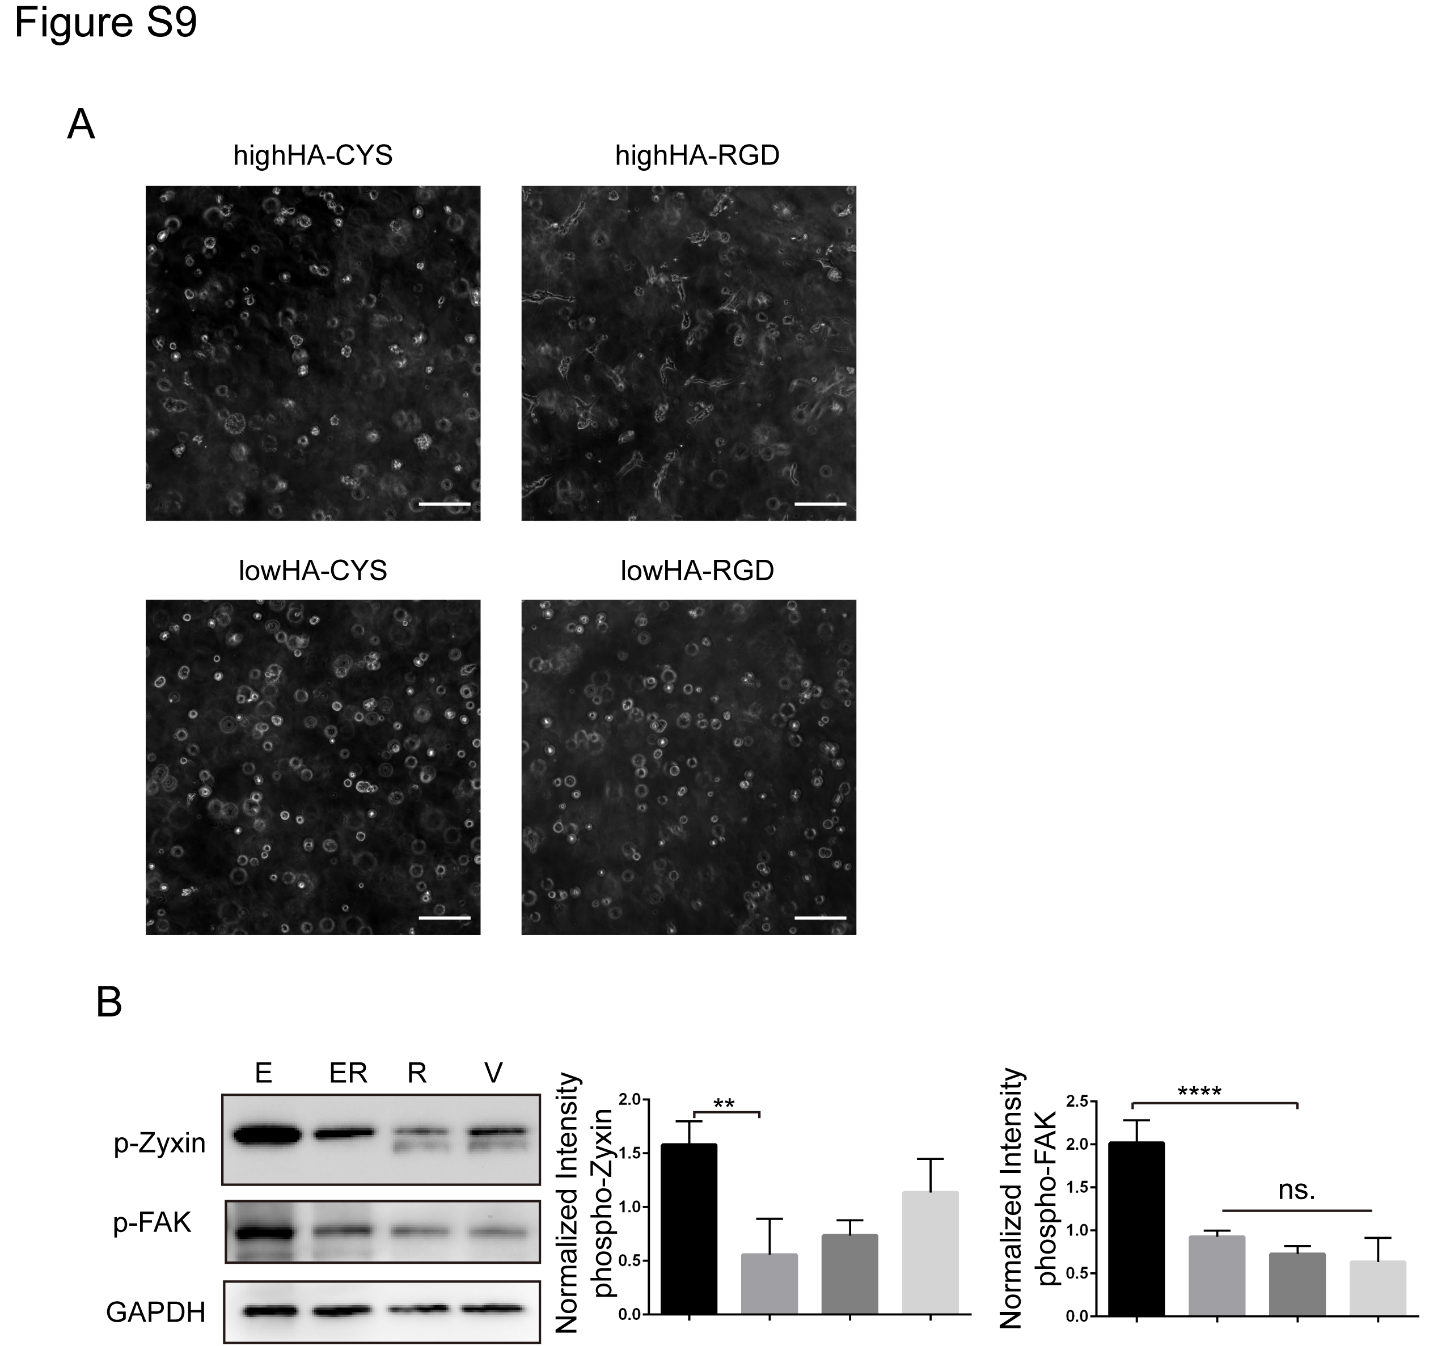


Figure S9. Effects of HA and RGD in hydrogel scaffolds on encapsulated HK423 cells. A) Representative phase contrast images after 8 days in different hydrogel conditions. Scale bars = 100 µm. B) Left panel, Western blot images of HK423 after 6 days of treatment. “E” - 1µM erlotinib, “ER” - 1µM erlotinib and 50 µM cycloRGD, “R” - 50 µM cyclo-RGD, “V” - vehicle (DMSO in PBS). Right panel, densitometry analysis of normalized integrated intensity signals of phospho-FAK and phospho-zyxin (n=3). Error bars represent standard deviation from individual experimental repeats. One-way ANOVA and Tukeys’s multiple comparison test was used. **p*<0.05, ***p*<0.01, ****p*<0.001, *****p*<0.0001.


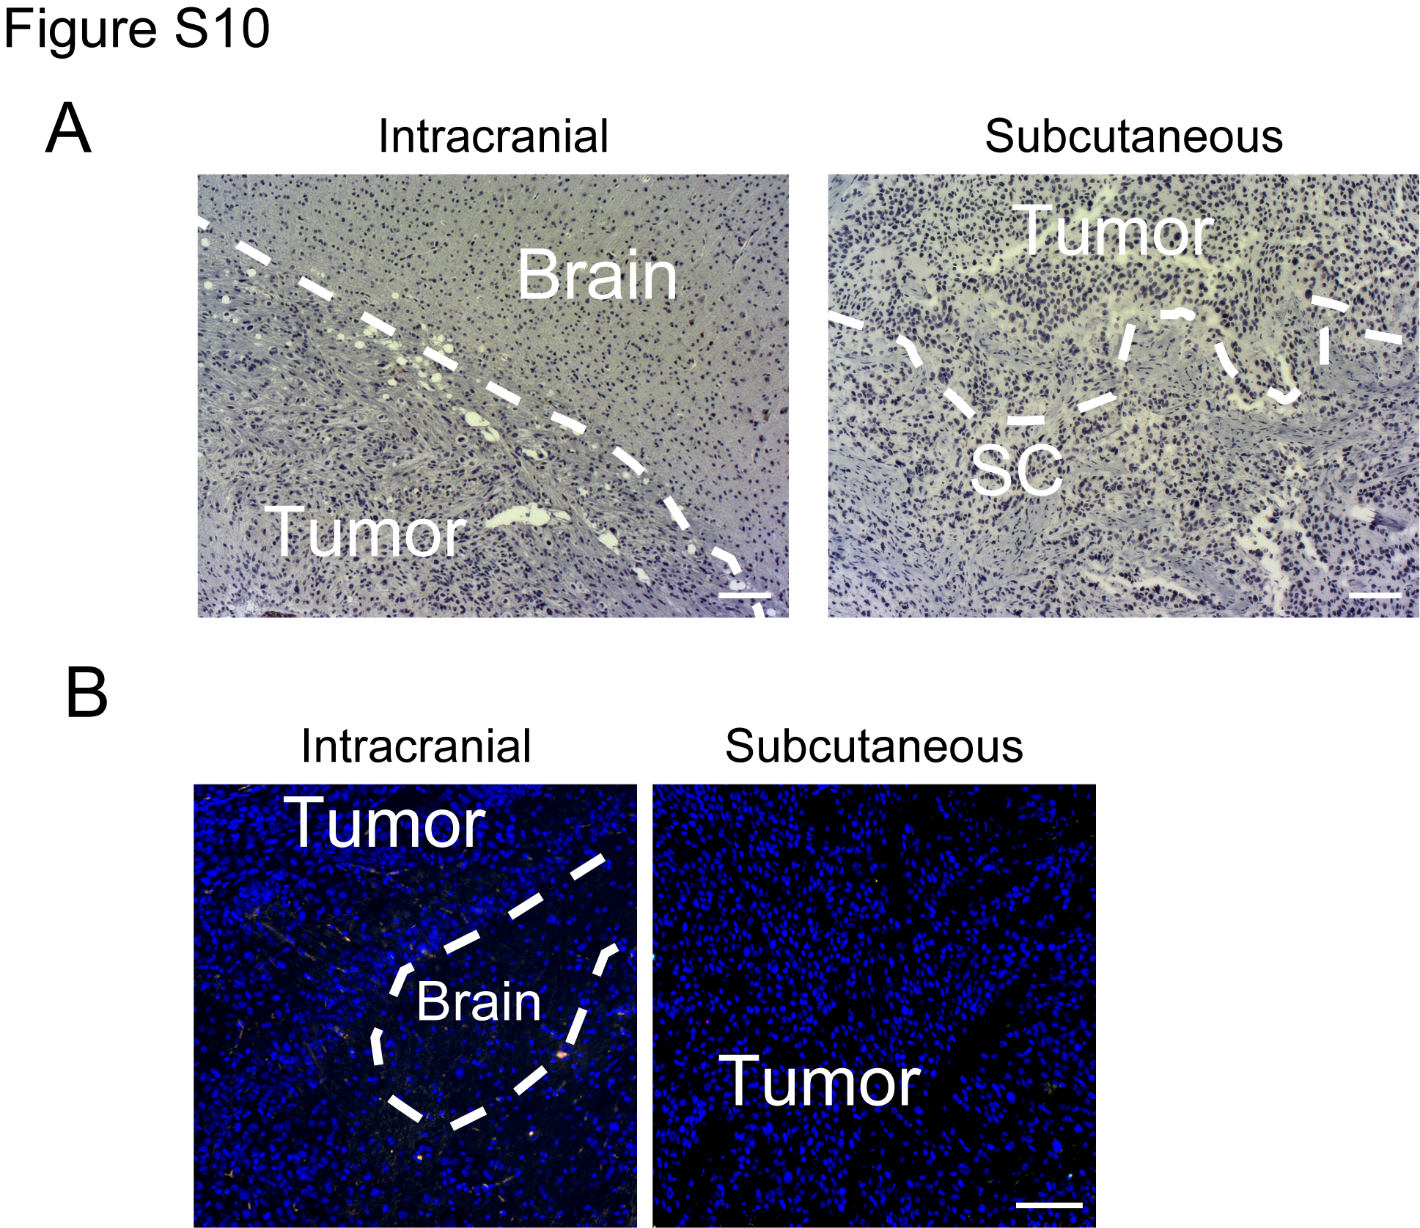


Figure S10. A) Negative control images for HA staining of adjacent sections in the same tissues shown in Fig. 1C. B) Negative control images for HA staining of adjacent sections in the same tissues shown in Fig. 1D.

**
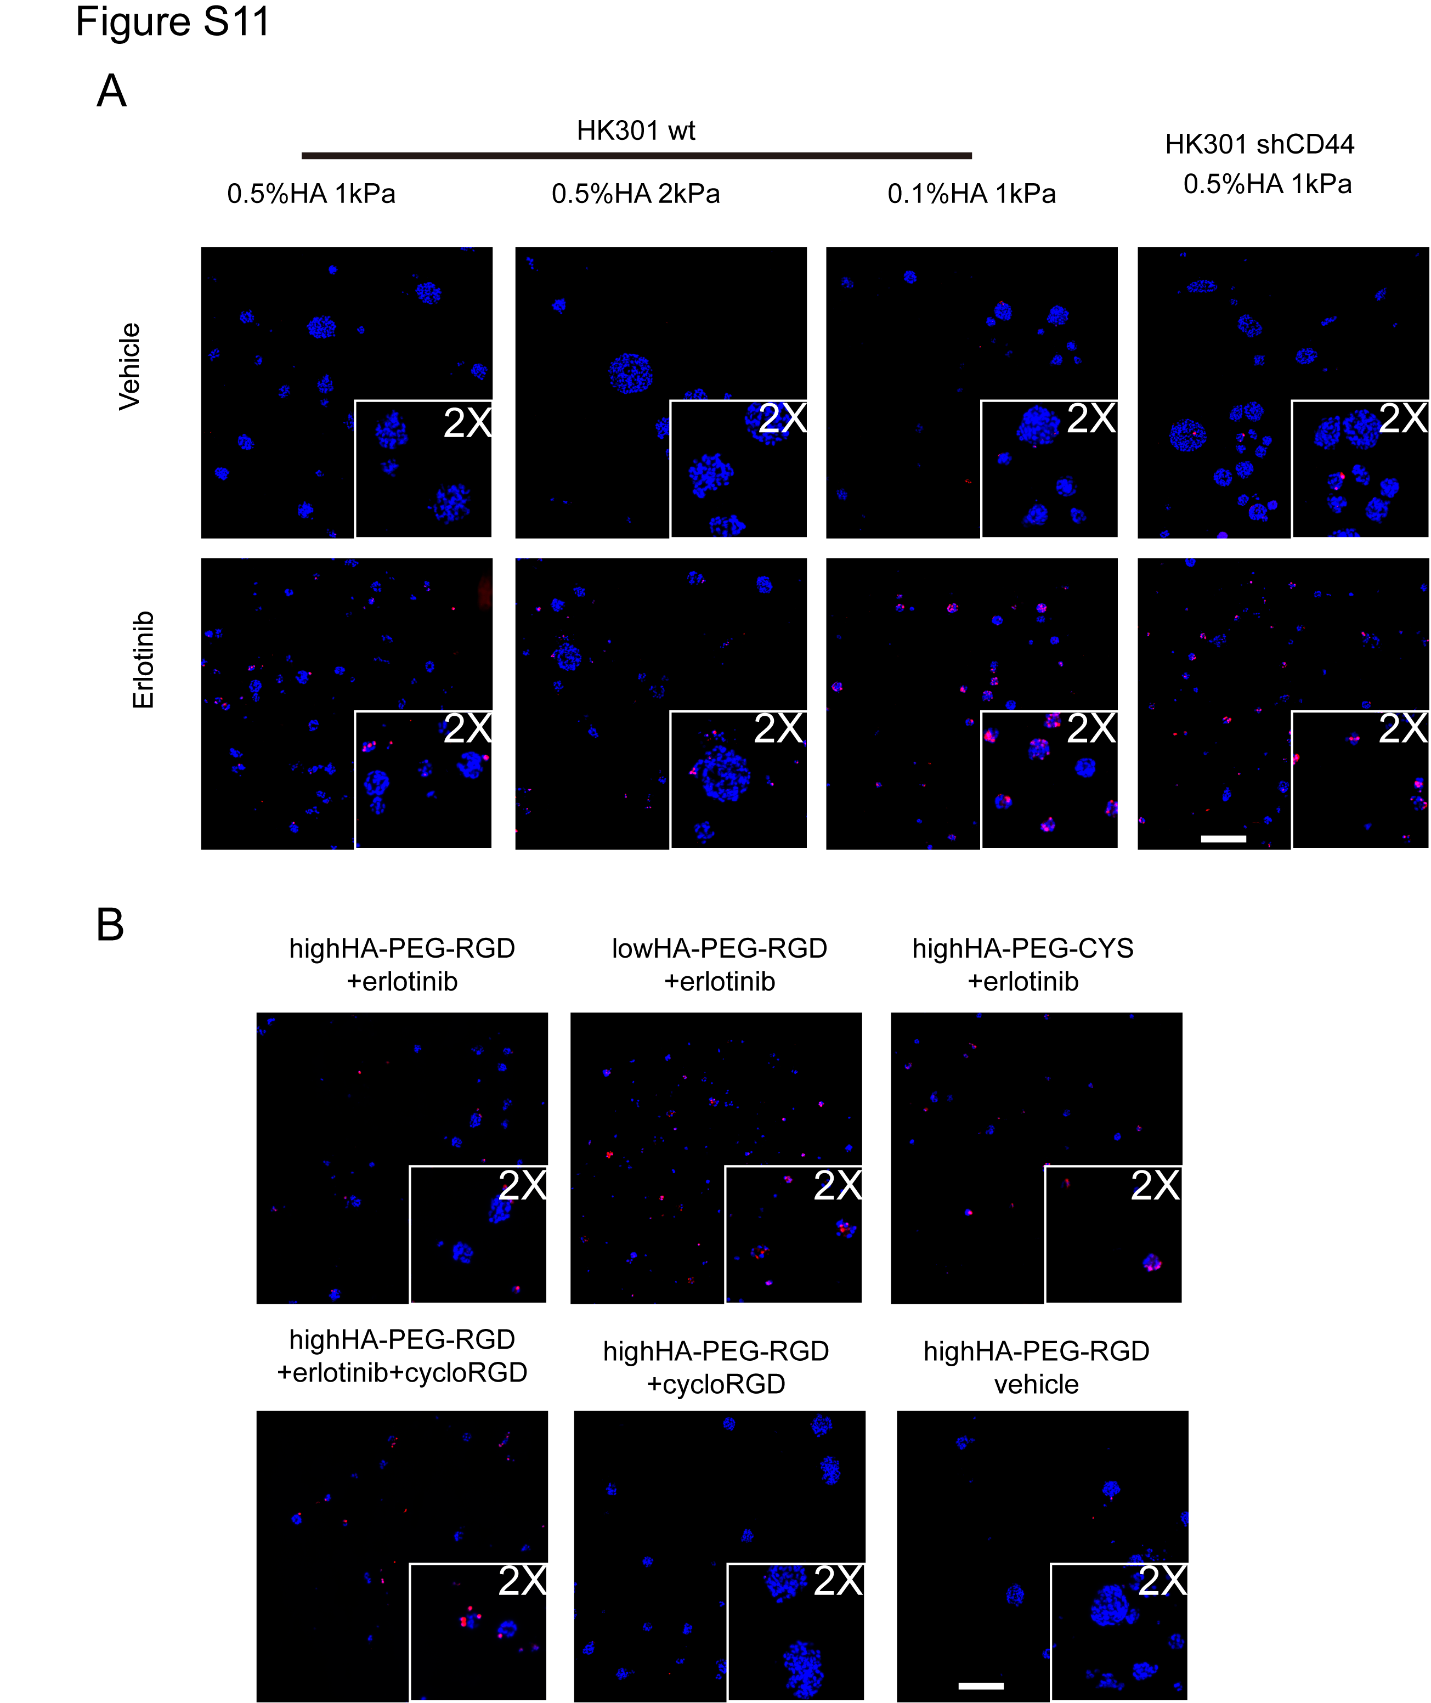
**

Figure S11. Hydrogel conditions affect apoptotic efficacy of erlotinib on HK301 cells. A) Representative images of immunofluorescence staining for c-PARP (red) after 6 days of erlotinib treatment. Scale bars = 200 µm. B) Representative images of immunofluorescence staining for c-PARP (red) after 3 days of treatment with erlotinib and/or cyclo-RGD (or vehicle). HA percentage indicates volume to weight percentage (% w/v). Nuclear counterstain (Hoechst 33342) in blue.


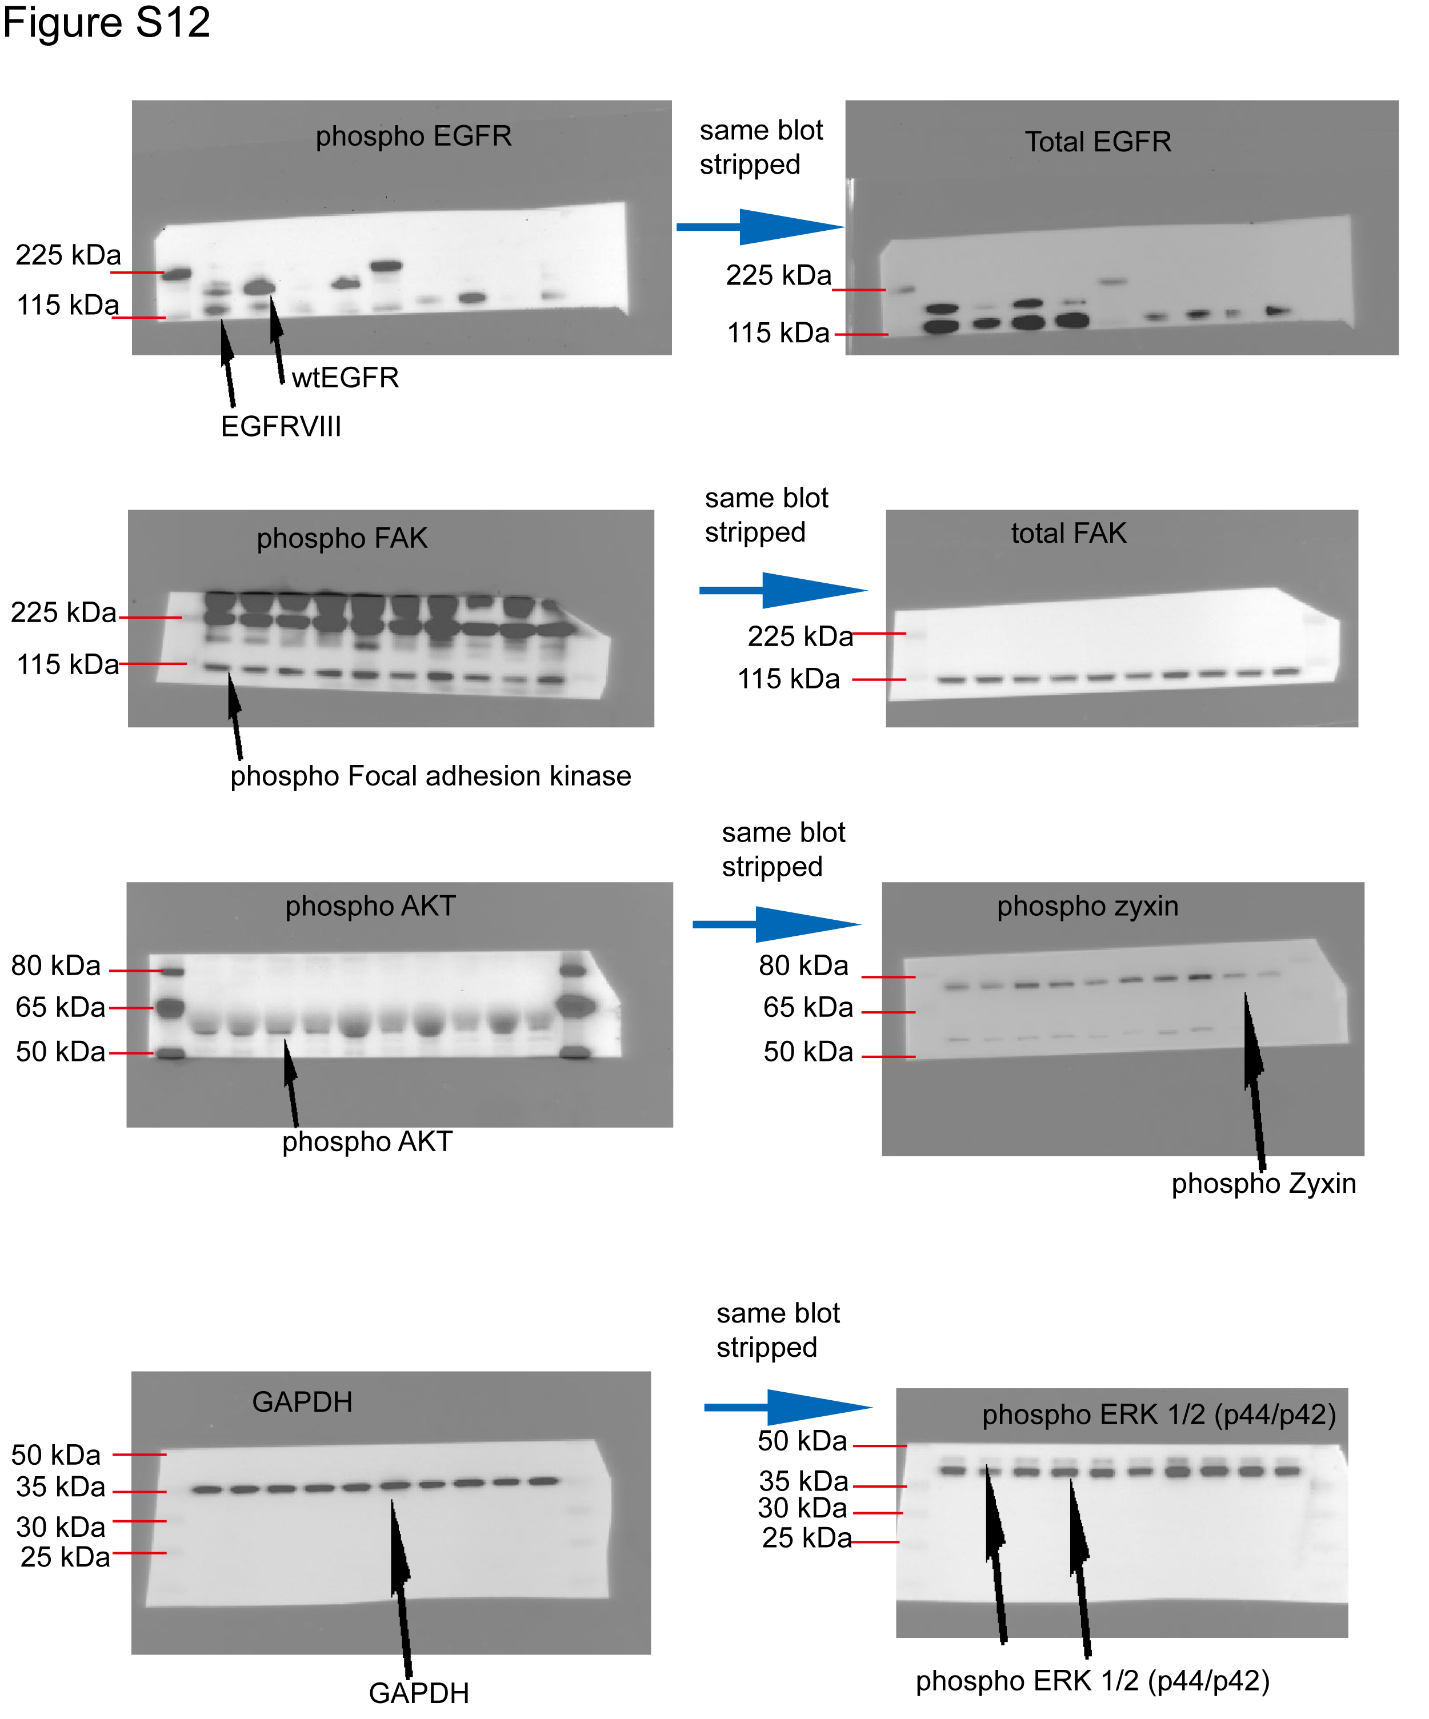


Figure. S12. Verification of band selection by size based on ladder standard for molecular weights for all antibodies used for Western blots in manuscript. Ladder bands are indicated by red lines
